# Supplementary material for: Does hospital variation in intrapartum-related perinatal mortality among caesarean births reflect differences in quality of care? Cross-sectional study in 21 hospitals in Burkina Faso
Source: HighWire-hosted journal article supplement (doi:10.1136/bmjopen-2021-055241), 2022-10-01
Supplement: bmjopen-2021-055241supp001_data_supplement.pdf [file bmjopen-2021-055241supp001_data_supplement.pdf]

## Supplementary materials

### Supplementary Figure 1. Odds ratios and 95% confidence intervals for individual-level risk factors for intrapartum-related mortality (model 1)

$$\text{median OR} = \exp[\sqrt{2 \times \tau^2 \times 0.6745}]$$

where  $\tau^2$  is the hospital-level variance.

### Supplementary Table 1. Missing data for risk factors for intrapartum-related perinatal mortality among 5,134 women in sample

| Variable                                                                         | N total expected | N missing | % missing (whole sample) | % missing (sub-sample) |
|----------------------------------------------------------------------------------|------------------|-----------|--------------------------|------------------------|
| <b>Risk factors for which all women are expected to have data</b>                |                  |           |                          |                        |
| Maternal age                                                                     | 5,134            | 102       | 2.0                      | -                      |
| Parity                                                                           | 5,134            | 10        | 0.2                      | -                      |
| Education                                                                        | 5,134            | 74        | 1.4                      | -                      |
| Previous caesarean                                                               | 5,134            | 0         | 0                        | -                      |
| Number of antenatal visits                                                       | 5,134            | 382       | 7.4                      | -                      |
| Multiple pregnancy                                                               | 5,134            | 0         | 0                        | -                      |
| Malformation                                                                     | 5,134            | 396       | 7.7                      | -                      |
| Birthweight                                                                      | 5,134            | 253       | 4.9                      | -                      |
| Acute fetal distress diagnosis                                                   | 5,134            | 496       | 9.7                      | -                      |
| Transverse lie or brow presentation                                              | 5,134            | 0         | 0                        | -                      |
| Other severe obstetric complication or maternal death                            | 5,134            | 0         | 0                        | -                      |
| Neonatal resuscitation                                                           | 5,134            | 242       | 4.7                      | -                      |
| Labour phase                                                                     | 5,134            | 0         | 0                        | -                      |
| Referral status                                                                  | 5,134            | 0         | 0                        | -                      |
| Primary indication for caesarean                                                 | 5,134            | 0         | 0                        | -                      |
| Provider deciding to perform caesarean                                           | 5,134            | 7         | 0.1                      | -                      |
| Provider performing caesarean                                                    | 5,134            | 71        | 1.4                      | -                      |
| Decision-incision interval                                                       | 5,134            | 1212      | 23.6                     | -                      |
| Anaesthesia type                                                                 | 5,134            | 39        | 0.8                      | -                      |
| Skin incision type                                                               | 5,134            | 176       | 3.4                      | -                      |
| Antibiotic prophylaxis administration                                            | 5,134            | 149       | 2.9                      | -                      |
| Hospital type                                                                    | 5,134            | 0         | 0                        | -                      |
| Monthly caesarean volume                                                         | 5,134            | 0         | 0                        | -                      |
| <b>Risk factors for which a subset of women are expected to have data</b>        |                  |           |                          |                        |
| Birthweight for second baby among multiple pregnancies                           | 301              | 91        | 1.8                      | 30.2                   |
| Referral distance among referred women                                           | 3,429            | 1039      | 20.2                     | 30.3                   |
| Timing of antibiotic administration among women receiving antibiotic prophylaxis | 4,918            | 1159      | 22.6                     | 23.6                   |
| <b>Variable used in the imputation model but not in the risk factor analysis</b> |                  |           |                          |                        |
| Gestational age at birth                                                         | 5,134            | 2808      | 54.7                     | -                      |

**Supplementary Table 2. Characteristics of women with missing data on risk factors among 5,134 women in sample**

| Risk factor                                          | N     | Missing data for 0 risk factors (row %) | Missing data for 1-3 risk factors (row %) | Missing data for 4 or more risk factors (row %) |
|------------------------------------------------------|-------|-----------------------------------------|-------------------------------------------|-------------------------------------------------|
| Maternal age                                         |       |                                         |                                           |                                                 |
| 13-19                                                | 883   | 31                                      | 65                                        | 4                                               |
| 20-29                                                | 2,376 | 33                                      | 63                                        | 4                                               |
| 30-39                                                | 1,612 | 33                                      | 63                                        | 4                                               |
| 40-49                                                | 161   | 26                                      | 70                                        | 4                                               |
| Missing                                              | 102   | 0                                       | 90                                        | 10                                              |
| Parity                                               |       |                                         |                                           |                                                 |
| 0                                                    | 1,784 | 33                                      | 64                                        | 4                                               |
| 1-3                                                  | 2,358 | 32                                      | 64                                        | 4                                               |
| 4 or more                                            | 982   | 29                                      | 67                                        | 4                                               |
| Missing                                              | 10    | 0                                       | 70                                        | 30                                              |
| Education                                            |       |                                         |                                           |                                                 |
| None                                                 | 3,256 | 31                                      | 65                                        | 4                                               |
| Primary                                              | 724   | 29                                      | 66                                        | 4                                               |
| Secondary or higher                                  | 1,080 | 38                                      | 60                                        | 2                                               |
| Missing                                              | 74    | 0                                       | 88                                        | 12                                              |
| Previous caesarean                                   |       |                                         |                                           |                                                 |
| No                                                   | 3,776 | 31                                      | 65                                        | 4                                               |
| Yes                                                  | 1,308 | 33                                      | 64                                        | 3                                               |
| Missing                                              | 50    | 24                                      | 54                                        | 22                                              |
| Number of antenatal care visits                      |       |                                         |                                           |                                                 |
| 0                                                    | 42    | 19                                      | 76                                        | 5                                               |
| 1-3                                                  | 1,899 | 32                                      | 65                                        | 3                                               |
| 4 or more                                            | 2,811 | 36                                      | 61                                        | 3                                               |
| Missing                                              | 382   | 0                                       | 87                                        | 13                                              |
| Multiple pregnancy                                   |       |                                         |                                           |                                                 |
| No                                                   | 4,833 | 32                                      | 64                                        | 4                                               |
| Yes                                                  | 301   | 20                                      | 71                                        | 9                                               |
| Congenital malformation                              |       |                                         |                                           |                                                 |
| No                                                   | 4,694 | 35                                      | 64                                        | 2                                               |
| Yes                                                  | 44    | 14                                      | 77                                        | 9                                               |
| Missing                                              | 396   | 0                                       | 73                                        | 27                                              |
| Gestational age at birth                             |       |                                         |                                           |                                                 |
| Preterm                                              | 286   | 26                                      | 69                                        | 6                                               |
| Term                                                 | 2,040 | 36                                      | 61                                        | 3                                               |
| Missing                                              | 2,715 | 30                                      | 66                                        | 4                                               |
| Birthweight                                          |       |                                         |                                           |                                                 |
| Birthweight $\geq$ 2,500g                            | 4,071 | 35                                      | 63                                        | 2                                               |
| Birthweight<2,500g                                   | 775   | 28                                      | 68                                        | 3                                               |
| Missing                                              | 288   | 0                                       | 72                                        | 28                                              |
| Acute fetal distress                                 |       |                                         |                                           |                                                 |
| No                                                   | 3,168 | 34                                      | 64                                        | 2                                               |
| Yes                                                  | 1,470 | 37                                      | 61                                        | 2                                               |
| Missing                                              | 496   | 0                                       | 81                                        | 19                                              |
| Transverse lie or brow presentation in active labour |       |                                         |                                           |                                                 |
| No                                                   | 4,922 | 32                                      | 65                                        | 4                                               |
| Yes                                                  | 212   | 29                                      | 63                                        | 8                                               |

|                                                       |       |    |    |    |
|-------------------------------------------------------|-------|----|----|----|
| Other severe obstetric complication or maternal death |       |    |    |    |
| No                                                    | 4,125 | 32 | 64 | 3  |
| Yes                                                   | 1,009 | 29 | 66 | 5  |
| Neonatal resuscitation                                |       |    |    |    |
| No                                                    | 4,273 | 34 | 63 | 2  |
| Yes                                                   | 619   | 27 | 70 | 3  |
| Missing                                               | 242   | 0  | 70 | 30 |
| Labour phase                                          |       |    |    |    |
| Pre-labour                                            | 1,031 | 29 | 67 | 4  |
| Latent phase                                          | 1,577 | 36 | 61 | 3  |
| Active phase                                          | 2,526 | 30 | 66 | 4  |
| Referral status                                       |       |    |    |    |
| Not referred before caesarean                         | 1,705 | 39 | 58 | 3  |
| Referred before caesarean                             | 3,429 | 28 | 68 | 4  |
| Referral distance                                     |       |    |    |    |
| <20km                                                 | 911   | 43 | 55 | 3  |
| 20-450km                                              | 1,479 | 39 | 58 | 4  |
| Distance unknown                                      | 1,039 | 0  | 94 | 6  |
| Primary indication for caesarean                      |       |    |    |    |
| Fetal distress                                        | 1,125 | 36 | 61 | 3  |
| Prolonged labour                                      | 1,695 | 31 | 66 | 4  |
| Previous caesarean                                    | 830   | 30 | 66 | 3  |
| Pre-eclampsia                                         | 193   | 28 | 67 | 5  |
| Other                                                 | 1,291 | 31 | 64 | 5  |
| Provider cadre deciding to perform caesarean          |       |    |    |    |
| Obstetrician                                          | 3,129 | 37 | 60 | 3  |
| Generalist doctor with emergency surgical training    | 936   | 27 | 68 | 4  |
| Generalist doctor                                     | 446   | 21 | 74 | 5  |
| Midwife                                               | 500   | 24 | 73 | 3  |
| Non-physician provider with surgical skills           | 116   | 7  | 86 | 7  |
| Missing                                               | 7     | 0  | 71 | 29 |
| Provider cadre performing caesarean                   |       |    |    |    |
| Obstetrician                                          | 1,905 | 32 | 63 | 5  |
| Generalist doctor                                     | 895   | 28 | 67 | 5  |
| Non-physician provider with obstetrics skills         | 224   | 18 | 81 | 0  |
| Non-physician provider with surgical skills           | 2,039 | 36 | 62 | 3  |
| Missing                                               | 71    | 0  | 92 | 8  |
| Decision-to-incision interval                         |       |    |    |    |
| <60min                                                | 878   | 36 | 61 | 2  |
| ≥60min                                                | 3,044 | 43 | 56 | 1  |
| Missing                                               | 1,212 | 0  | 89 | 11 |
| Anaesthesia type                                      |       |    |    |    |
| Spinal                                                | 4,505 | 32 | 64 | 3  |
| General/other                                         | 590   | 29 | 66 | 5  |
| Missing                                               | 39    | 0  | 46 | 54 |
| Skin incision type                                    |       |    |    |    |
| Joel-Cohen                                            | 4,128 | 34 | 63 | 3  |
| Pfannenstiel                                          | 730   | 27 | 70 | 4  |
| Midline/other                                         | 100   | 25 | 72 | 3  |
| Missing                                               | 176   | 0  | 78 | 22 |
| Uterine incision type                                 |       |    |    |    |
| Lower segment                                         | 4,921 | 33 | 64 | 3  |
| Other                                                 | 161   | 11 | 86 | 2  |
| Missing                                               | 52    | 0  | 60 | 40 |

|                                       |       |    |    |    |
|---------------------------------------|-------|----|----|----|
| Antibiotic prophylaxis administration |       |    |    |    |
| Antibiotics before incision           | 1,434 | 43 | 56 | 1  |
| Antibiotics after incision            | 2,325 | 43 | 56 | 1  |
| Antibiotics, timing unclear           | 1,159 | 0  | 90 | 10 |
| No recorded antibiotics               | 67    | 24 | 75 | 1  |
| Missing                               | 149   | 0  | 74 | 26 |
| Hospital type                         |       |    |    |    |
| Regional hospital                     | 2,693 | 39 | 58 | 2  |
| Urban district hospital               | 1,659 | 26 | 70 | 4  |
| Rural district hospital               | 782   | 18 | 75 | 7  |
| Mean monthly caesarean volume         |       |    |    |    |
| <30                                   | 923   | 25 | 70 | 4  |
| 30-60                                 | 1,717 | 20 | 74 | 5  |
| 60-105                                | 2,494 | 42 | 56 | 2  |

Supplementary Table 3. Maternal and perinatal outcomes among women giving birth by caesarean section in 21 hospitals – Burkina Faso, 2016

|                         | N women      | Perinatal outcomes                |                               |                                        |                                                   |                                                           |                                                 |                                                    |
|-------------------------|--------------|-----------------------------------|-------------------------------|----------------------------------------|---------------------------------------------------|-----------------------------------------------------------|-------------------------------------------------|----------------------------------------------------|
|                         |              | Macerated stillbirths (per 1,000) | Fresh stillbirths (per 1,000) | Apgar score <3, live birth (per 1,000) | Neonatal death within 24 hrs of birth (per 1,000) | Neonatal death after 24 hrs, before discharge (per 1,000) | Intrapartum-related perinatal death (per 1,000) | Total perinatal death before discharge (per 1,000) |
| <b>Total</b>            | <b>5,134</b> | <b>7</b><br><b>[5-9]</b>          | <b>65</b><br><b>[58-72]</b>   | <b>24</b><br><b>[20-29]</b>            | <b>23</b><br><b>[20-28]</b>                       | <b>3</b><br><b>[2-5]</b>                                  | <b>88</b><br><b>[81-96]</b>                     | <b>98</b><br><b>[90-107]</b>                       |
| Range across hospitals  | 5,134        | 0-23                              | 16-135                        | 0-90                                   | 0-90                                              | 0-32                                                      | 21-189                                          | 32-243                                             |
| <b>Facility type</b>    |              |                                   |                               |                                        |                                                   |                                                           |                                                 |                                                    |
| Regional hospital       | 2,693        | 9<br>[6-14]                       | 78<br>[68-89]                 | 32<br>[26-39]                          | 30<br>[24-37]                                     | 4<br>[2-7]                                                | <b>108</b><br><b>[97-120]</b>                   | <b>121</b><br><b>[109-134]</b>                     |
| Urban district hospital | 1,659        | 3<br>[1-7]                        | 36<br>[28-46]                 | 9<br>[5-15]                            | 10<br>[06-16]                                     | 2<br>[1-6]                                                | <b>46</b><br><b>[37-57]</b>                     | <b>51</b><br><b>[42-63]</b>                        |
| Rural district hospital | 782          | 5<br>[2-14]                       | 81<br>[63-102]                | 31<br>[21-45]                          | 29<br>[20-44]                                     | 4<br>[1-12]                                               | <b>110</b><br><b>[90-134]</b>                   | <b>119</b><br><b>[98-144]</b>                      |
| P-value                 | -            | 0.08                              | <0.001                        | 0.029                                  | 0.016                                             | 0.793                                                     | <b>0.001</b>                                    | <b>0.001</b>                                       |

**Supplementary table 4. Risk factors for intrapartum-related deaths among 5,134 women giving birth by caesarean section in 21 hospitals – Burkina Faso, 2016**

| Risk factor                                           | Unadjusted OR<br>(95% CI) | Model 1 <sup>a</sup><br>(95% CI) | Model 2 <sup>b</sup><br>(95% CI) |
|-------------------------------------------------------|---------------------------|----------------------------------|----------------------------------|
| <b>Individual-level clinical risk factors</b>         |                           |                                  |                                  |
| Maternal age                                          |                           |                                  |                                  |
| 13-19                                                 | 1 [ref]                   | -                                | -                                |
| 20-29                                                 | 1.31 (0.98-1.76)          | -                                | -                                |
| 30-39                                                 | 1.56 (1.15-2.10)          | -                                | -                                |
| 40-54                                                 | 2.09 (1.21-3.58)          | -                                | -                                |
| Parity                                                |                           |                                  |                                  |
| 0                                                     | 1 [ref]                   | 1 [ref]                          | 1 [ref]                          |
| 1-3                                                   | 1.15 (0.90-1.47)          | 0.80 (0.56-1.13)                 | 1.30 (0.99-1.71)                 |
| 4 or more                                             | 2.46 (1.91-3.18)          | 0.52 (0.34-0.78)                 | 1.84 (1.38-2.46)                 |
| Education                                             |                           |                                  |                                  |
| None                                                  | 1 [ref]                   | 1 [ref]                          | 1 [ref]                          |
| Primary                                               | 0.64 (0.46-0.89)          | 0.89 (0.61-1.31)                 | 0.79 (0.56-1.13)                 |
| Secondary or higher                                   | 0.31 (0.21-0.46)          | 0.53 (0.34-0.85)                 | 0.55 (0.36-0.83)                 |
| Number of previous caesareans                         |                           |                                  |                                  |
| 0                                                     | 1 [ref]                   | -                                | -                                |
| 1 or more                                             | 0.39 (0.29-0.52)          | -                                | -                                |
| Number of ANC visits                                  |                           |                                  |                                  |
| 0                                                     | 1 [ref]                   | 1 [ref]                          | -                                |
| 1-3                                                   | 0.58 (0.24-1.36)          | 0.54 (0.19-1.48)                 | -                                |
| 4 or more                                             | 0.35 (0.15-0.81)          | 0.43 (0.16-1.18)                 | -                                |
| Multiple pregnancy                                    |                           |                                  |                                  |
| No                                                    | 1 [ref]                   | -                                | -                                |
| Yes                                                   | 1.43 (0.99-2.07)          | -                                | -                                |
| Malformation                                          |                           |                                  |                                  |
| No                                                    | 1 [ref]                   | 1 [ref]                          | 1 [ref]                          |
| Yes                                                   | 7.15 (3.75-13.64)         | 6.01 (2.95-12.23)                | 5.67 (2.79-11.55)                |
| Birthweight                                           |                           |                                  |                                  |
| Birthweight ≥2,500g                                   | 1 [ref]                   | 1 [ref]                          | 1 [ref]                          |
| Birthweight <2,500g                                   | 1.77 (1.39-2.25)          | 1.50 (1.14-1.97)                 | 1.45 (1.10-1.92)                 |
| Diagnosis of acute fetal distress                     |                           |                                  |                                  |
| No                                                    | 1 [ref]                   | 1 [ref]                          | 1 [ref]                          |
| Yes                                                   | 2.26 (1.79-2.86)          | 2.42 (1.80-3.26)                 | 2.34 (1.72-3.17)                 |
| Transverse lie or brow presentation in active labour  |                           |                                  |                                  |
| No                                                    | 1 [ref]                   | 1 [ref]                          | 1 [ref]                          |
| Yes                                                   | 3.69 (2.65-5.13)          | 3.56 (2.43-5.22)                 | 3.81 (2.59-5.59)                 |
| Other severe obstetric complication or maternal death |                           |                                  |                                  |
| No                                                    | 1 [ref]                   | 1 [ref]                          | 1 [ref]                          |
| Yes                                                   | 3.49 (2.84-4.29)          | 3.88 (3.04-4.95)                 | 3.50 (2.73-4.49)                 |
| Labour phase                                          |                           |                                  |                                  |
| Pre-labour                                            | 1 [ref]                   | -                                | -                                |
| Latent phase                                          | 1.20 (0.84-1.71)          | -                                | -                                |
| Active phase                                          | 2.12 (1.53-2.92)          | -                                | -                                |

|                                                               |                  |                  |                  |
|---------------------------------------------------------------|------------------|------------------|------------------|
| Referral status                                               |                  |                  |                  |
| Not referred                                                  | 1 [ref]          | 1 [ref]          | 1 [ref]          |
| Referred from <20km                                           | 2.17 (1.51-3.11) | 1.52 (1.04-2.21) | 1.46 (1.01-2.13) |
| Referred from 20-450km                                        | 4.24 (3.10-5.80) | 2.17 (1.55-3.04) | 2.18 (1.55-3.06) |
| Decision-to-delivery interval                                 |                  |                  |                  |
| <60 minutes                                                   | 1 [ref]          | -                | -                |
| ≥60 minutes                                                   | 0.85 (0.65-1.11) | -                | -                |
| Primary indication for caesarean                              |                  |                  |                  |
| Fetal distress                                                | 1 [ref]          | 1 [ref]          | 1 [ref]          |
| Prolonged labour                                              | 1.10 (0.85-1.43) | 1.14 (0.81-1.59) | 1.04 (0.74-1.46) |
| Previous caesarean                                            | 0.23 (0.13-0.39) | 0.51 (0.28-0.92) | 0.49 (0.27-0.90) |
| Pre-eclampsia                                                 | 0.59 (0.31-1.13) | 0.38 (0.19-0.80) | 0.35 (0.17-0.74) |
| Other                                                         | 1.37 (1.04-1.80) | 2.08 (1.44-3.00) | 1.90 (1.31-2.74) |
| <b>Caesarean care components and hospital characteristics</b> |                  |                  |                  |
| Provider cadre deciding the caesarean                         |                  |                  |                  |
| Obstetrician                                                  | 1 [ref]          |                  | -                |
| Generalist doctor with emergency surgical training            | 1.20 (0.84-1.73) |                  | -                |
| Generalist doctor                                             | 1.20 (0.73-1.96) |                  | -                |
| Midwife                                                       | 1.78 (1.07-2.96) |                  | -                |
| Non-physician provider with surgical skills <sup>c</sup>      | 1.87 (0.82-4.28) |                  | -                |
| Provider cadre performing the caesarean                       |                  |                  |                  |
| Obstetrician                                                  | 1 [ref]          |                  | -                |
| Generalist doctor                                             | 0.94 (0.62-1.44) |                  | -                |
| Non-physician provider with obstetrics skills <sup>d</sup>    | 1.47 (0.81-2.68) |                  | -                |
| Non-physician provider with surgical skills <sup>c</sup>      | 1.01 (0.68-1.49) |                  | -                |
| Type of anaesthesia                                           |                  |                  |                  |
| Spinal                                                        | 1 [ref]          |                  | 1 [ref]          |
| General/other                                                 | 4.46 (3.41-5.84) |                  | 2.60 (1.94-3.47) |
| Type of skin incision                                         |                  |                  |                  |
| Joel-Cohen                                                    | 1 [ref]          |                  | -                |
| Other                                                         | 0.89 (0.62-1.28) |                  | -                |
| Type of uterine incision                                      |                  |                  |                  |
| Lower segment                                                 | 1 [ref]          |                  | -                |
| Other                                                         | 1.23 (0.69-2.19) |                  | -                |
| Antibiotics administration                                    |                  |                  |                  |
| Antibiotics before incision                                   | 1 [ref]          |                  | 1 [ref]          |
| Antibiotics after incision                                    | 0.99 (0.74-1.31) |                  | 0.94 (0.72-1.23) |
| No recorded antibiotics                                       | 2.31 (1.25-4.25) |                  | 2.91 (1.46-5.81) |
| Neonatal resuscitation                                        |                  |                  |                  |
| No                                                            | 1 [ref]          |                  | -                |
| Yes                                                           | 1.71 (1.31-2.24) |                  | -                |
| Hospital type                                                 |                  |                  |                  |
| Regional hospital                                             | 1 [ref]          |                  | -                |
| Urban district hospital                                       | 0.36 (0.23-0.58) |                  | -                |
| Rural district hospital                                       | 0.96 (0.62-1.47) |                  | -                |
| Hospital caesarean volume (per month)                         |                  |                  |                  |

|        |                  |  |   |
|--------|------------------|--|---|
| <30    | 1 [ref]          |  | - |
| 30-60  | 0.93 (0.55-1.57) |  | - |
| 60-105 | 0.53 (0.30-0.94) |  | - |

<sup>a</sup>Model 1 was built by manual backward elimination of individual-level risk factors with p>0.1 in a model including all variables with p<0.25 in the unadjusted model, with the exception of maternal age which had p<0.25 in the unadjusted model but was removed due to collinearity with parity

<sup>b</sup>Model 2 was built by adding all care components and hospital characteristics with p<0.25 to model 1, followed by manual backward selection until all remaining variables had p<0.1

<sup>c</sup>Nurses or midwives with additional 3-year training in surgery

<sup>d</sup>Midwives with additional 3-year training in obstetrics and gynaecology, including performing caesareans
